# Supplementary material for: Echinochloa Chloroplast Genomes: Insights into the Evolution and Taxonomic Identification of Two Weedy Species
Source: PLoS One. 2014 Nov 26;9(11):e113657. doi: 10.1371/journal.pone.0113657 (PMC4245208; doi:10.1371/journal.pone.0113657)
Supplement: Table S1 — Primers used in the assembly of two Echinochloa chloroplast genomes. (XLS) [file pone.0113657.s007.xls]

## Sheet: Table S1
Table S1 Primers used in the assembly of two Echinochloa chloroplast genomes.
	STB03 (E. oryzicola)	BTS02 (E. crus-galli)
Primers used in gap closure	5'-GCTTCTCCTGATGGTTGGTC-3' 5'-CAGTTTGGTAGCTCACGAGG-3'	5'-GACCCAGACATAGACGGTCG-3' 5'-CTTCCAAGCTAACGATGCGG-3'
	5'-TCGCATTTATTGCTACCGCA-3' 5'-TTGAAGCATCTCGCGCTATT-3'	5'-TAGCAATTCCCATTCCGCCC-3' 5'-ATTCGAGTCATAGGAGCCGC-3'
	5'-GTAACGAAGGGCGTGATCTT-3' 5'-CGATTTGTCAAGTCTCATGATCG-3'
	5'-ACGCGGAATGGTAGTGAATAG-3' 5'-TCTTCGTAGACCTCTTTCCGA-3'
Primers used in the regions between scaffolds	5'-GGTTGTACCAAGTCTGAAACCG-3' 5'-GCTACATCCGCCCCTTATCC-3'
	5'-GCTACATCCGCCCCTTATCC-3' 5'-AGCAGTACTAAGGAGGGTTCG-3'
Primers used in the regions between IR and SSC/LSC	5'-GCTACTCCTCCGATGCGAAA-3' 5'-CGTCAACGTTTGCTGGCTTA-3'
	5'-GGGTTATCCTGCGCTTGGAA-3' 5'-CTTCCCTCTAGACCTAGCTGC-3'
Primers used in the validation of indels between STB03 and Panicum virgatum chloroplast genomes	5‘-ATTGTCTCCACCCCGTAGGA-3’ 5‘-CAGTTCGCCAGGTTGTCTCT-3’
	5‘-CAGTTCGCCAGGTTGTCTCT-3’ 5‘-ATTGTCTCCACCCCGTAGGA-3’
Primers used in the validation of variations between STB03 and BTS02 chloroplast genomes	5' -GGAAACACTCTGCAAAGATCCA- 3' 5' -AAGCTTCGGGTAATTTGGCG- 3'
	5' -CTAAACCCTACTGCCCCGC- 3' 5' -CAGTTCAAATCTGGGTGCCG- 3'
	5' -GTGCTTCAGGATCCATTGCG- 3' 5' -GTGAAGCAATCCATTGGTCG- 3'
	5' -ACAGCAGTTCTTATGGCCCC- 3' 5' -TCGAACCGATGACTTCCGTC- 3'
	5' -CGATCATGAGACTTGACAAATCGAG- 3' 5' -ACTAAGCCTACTAAAGGCACGA- 3'
	5' -CTCGCATTTATTGCTACCGCA- 3' 5' -AGTATGGGGGAGGAGTGGAC- 3'
	5' -TCCAATGGAATCCCCACTCC- 3' 5' -CCGAGAAGGTCTACGGTTCG- 3'
	5' -GTGCCTACTCGGCATTTCAC- 3' 5' -GTTGATAGCCAAGGTCGCGT- 3'
