# Supplementary material for: Echinochloa Chloroplast Genomes: Insights into the Evolution and Taxonomic Identification of Two Weedy Species
Source: PLoS One. 2014 Nov 26;9(11):e113657. doi: 10.1371/journal.pone.0113657 (PMC4245208; doi:10.1371/journal.pone.0113657)
Supplement: Table S2 — The performed MCMC runs, burn in and the effective sample size (ESS). (XLS) [file pone.0113657.s008.xls]

## Sheet: Table S2
Table S2. The performed MCMC runs, burn in and the effective sample size (ESS).
	MCMC	burn-in	ESS_posterior
Whole chloroplast genome sequences	20000000	4000000	1614.77
Coding sequences of single copy genes	10000000	1000000	8077.13
