# Supplementary material for: Echinochloa Chloroplast Genomes: Insights into the Evolution and Taxonomic Identification of Two Weedy Species
Source: PLoS One. 2014 Nov 26;9(11):e113657. doi: 10.1371/journal.pone.0113657 (PMC4245208; doi:10.1371/journal.pone.0113657)
Supplement: Table S3 — Indels found in the Echinochloa chloroplast genomes. (XLS) [file pone.0113657.s009.xls]

## Sheet: Table S3
Table S3 Indels found in the Echinochloa chloroplast genomes
STB03 (E. oryzicola)		BTS02 (E. crus-galli)
Genomic location	Inserted sequence	Genomic location	Inserted sequence
3833-3835	AAA	1553	A
4366-4367	AA	5920-5923	TTAA
6472	T	7746-7748	TTA
6788-6789	AT	8076-8080	CAGAA
7611	T	8215-8220	TAGTCT
11684	T	12142	A
12469-12477	AGGTTGAAT	12269-12271	TTC
13506-13513	TTTCGATT	15465-15467	TCA
14177-14178	TT	16174	G
14853	A	16694-16696	TTT
17624-17625	AA	19400-19405	GCCGTT
18031-18050	TCATTGAAAGAGA	37882-37886	TTAAA
18177	A	43109-43110	TT
19702	T	43287	T
19952	T	44334	T
19997-19998	CC	46076-46080	AAAAA
20340	C	47224-47226	TTA
32947-32948	TT	49486	C
35319	A	52059	A
37836-37838	CCA	52535	A
44250	T	53382	A
47654-47679	ATCTTAATTATTAATCTTAATTATTA	53383-53387	TTGGG
47741-47746	GAATTA	60982-60986	TTTCC
48063-48065	TTT	62752-62756	GGGCT
48924-48928	AAAAA	65549-65551	TTT
49765-51990	GCTTCAA	66006-66010	GGAAG
52136-52138	AAA	67187-67188	TT
52203-52204	TT	72026-72030	TTTTA
52586-52590	ATCCT	107620-107624	TTAAA
53600-53603	GTAG	109770	T
55649	A
55679-55680	TT
56329	T
57894-57897	AAAA
58408	C
64065	T
64570-64571	CC
64931-64932	TT
68357	T
76979-76984	TTTTTT
80041	T
80651	T
80778	T
80801-80805	AAAAT
98410-98425	TTTTGAGATTTTGAGA
107408	C
107653	T
109826-109827	AA
123753-123768	AATCTCAAAATCTCAA
