# Supplementary material for: Echinochloa Chloroplast Genomes: Insights into the Evolution and Taxonomic Identification of Two Weedy Species
Source: PLoS One. 2014 Nov 26;9(11):e113657. doi: 10.1371/journal.pone.0113657 (PMC4245208; doi:10.1371/journal.pone.0113657)
Supplement: Table S4 — Number of protein-coding genes in the seven chloroplast genomes ( E. oryzicola , E. crus-galli , P. virgatum , S. bicolor , T. aestivum , O. sativa , and A. thaliana ). (XLS) [file pone.0113657.s010.xls]

## Sheet: Table S4
Table S4 Number of protein-coding genes in the seven chloroplast genomes (E. oryzicola, E. crus-galli, P. virgatum, S. bicolor, T. aestivum, O. sativa, and A. thaliana)
Gene	E. oryzicola	E. crus-galli	P. virgatum	S. bicolor	T. aestivum	O. sativa	A. thaliana
accD	0	0	0	0	0	0	1
ycf2	0	0	0	0	0	0	2
rps19	0	0	2	2	2	2	1
rps16	0	0	1	1	1	0	1
ycf15	0	0	0	0	0	0	0
ycf1	0	0	0	0	0	0	0
orf56	0	0	0	0	0	0	0
psbB	1	1	1	1	1	1	1
atpH	1	1	1	1	1	1	1
ndhI	1	1	1	1	1	1	1
psbK	1	1	1	1	1	1	1
rpl20	1	1	1	1	1	0	1
matK	1	1	1	1	1	1	1
ndhF	1	1	1	1	1	1	1
atpF	1	1	1	1	1	0	2
psbF	1	1	1	1	1	1	1
petN	1	1	1	1	1	0	2
rps7	2	2	2	2	2	2	2
psbE	1	1	1	1	1	1	1
petB	1	1	1	1	1	0	1
rpl16	1	1	1	1	1	1	1
petE	0	0	0	0	0	1	0
petG	1	1	1	1	1	0	1
petA	1	1	1	1	1	1	1
rps12	1	1	2	2	1	0	2
ndhH	1	1	1	1	1	1	1
rpl2	2	2	2	2	2	2	2
clpP	1	1	1	1	1	1	1
rps3	1	1	1	1	1	1	1
rps2	1	1	1	1	1	1	1
OrsaiCp51	0	0	0	0	0	1	0
atpB	1	1	1	1	1	0	1
ndhE	1	1	1	1	1	1	1
psaA	1	1	1	1	1	1	1
psbT	1	1	1	1	1	0	1
psbM	1	1	1	1	1	1	1
infA	1	1	1	1	1	1	0
rpoB	1	1	1	1	1	1	1
rpl36	1	1	1	1	1	0	1
psbC	1	1	1	1	1	1	1
ndhD	1	1	1	1	1	1	1
rpoC1	1	1	1	1	1	1	1
atpE	1	1	1	1	1	1	1
psbN	1	1	1	1	1	1	1
rps11	1	1	1	1	1	1	1
rps4	1	1	1	1	1	1	1
psaI	1	1	1	1	1	0	1
ndhC	1	1	1	1	1	1	1
psaJ	1	1	1	1	1	0	1
rps18	1	1	1	1	1	1	1
psbL	1	1	1	1	1	0	1
rpl33	1	1	1	1	1	1	1
ndhA	1	1	1	1	2	0	1
petL	1	1	1	1	1	0	1
rpl23	2	2	2	3	2	2	2
ndhG	1	1	1	1	1	1	1
rpl32	1	1	1	1	1	1	1
ndhK	1	1	1	1	1	1	1
rpl14	1	1	1	1	1	1	1
psaC	1	1	1	1	1	1	1
psbJ	1	1	1	1	1	0	1
rpl22	1	1	1	1	1	1	1
rps8	1	1	1	1	1	1	1
ndhB	2	2	2	2	2	0	2
psbH	1	1	1	1	1	1	1
ycf68	2	2	2	0	0	0	0
OrsaiCp24	0	0	0	0	0	1	0
rpoC2	1	1	1	1	1	1	1
rbcL	1	1	1	1	1	1	1
ndhJ	1	1	1	1	1	1	1
atpI	1	1	1	1	1	1	2
rpoA	1	1	1	1	1	1	1
ycf3	1	1	1	1	1	0	1
psbD	1	1	1	1	1	1	1
cemA	1	1	1	1	1	0	1
ccsA	1	1	1	1	1	1	1
psbZ	1	1	1	1	1	0	1
rps14	1	1	1	1	1	1	1
petD	1	1	1	1	1	1	1
atpA	1	1	1	1	1	1	1
rps15	2	2	2	2	2	2	1
psaB	1	1	1	1	1	1	1
psbI	1	1	1	1	1	1	1
psbA	1	1	1	1	1	1	1
ycf4	1	1	1	1	1	1	1
